# Supplementary material
Source: publisher site journal article supplement (https://www.dovepress.com/article/394625)
Supplement: Supplementary file 1 [file get_supplementary_file.php]

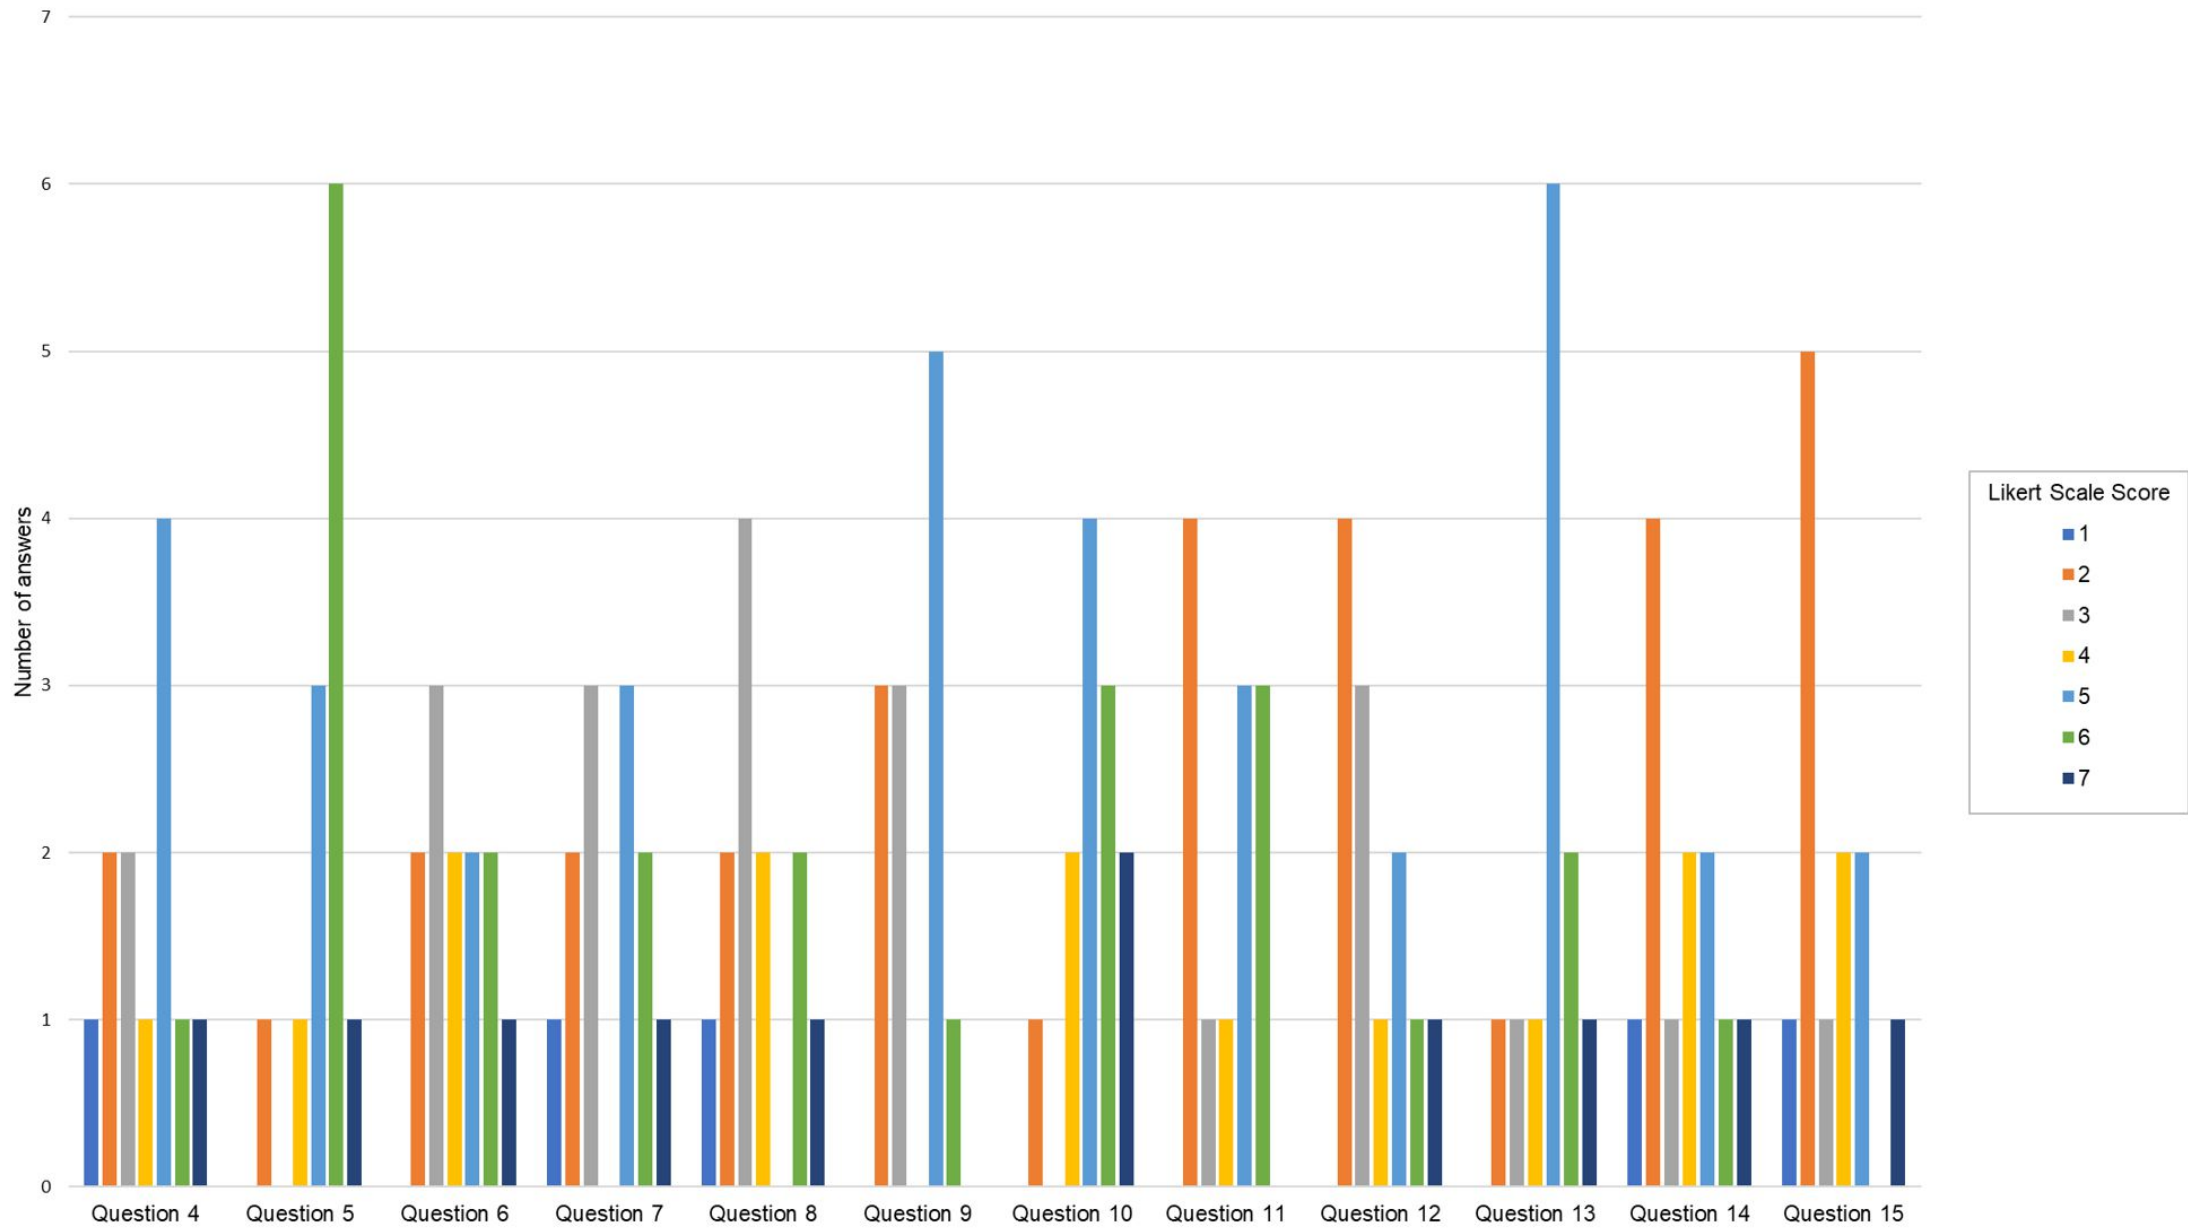

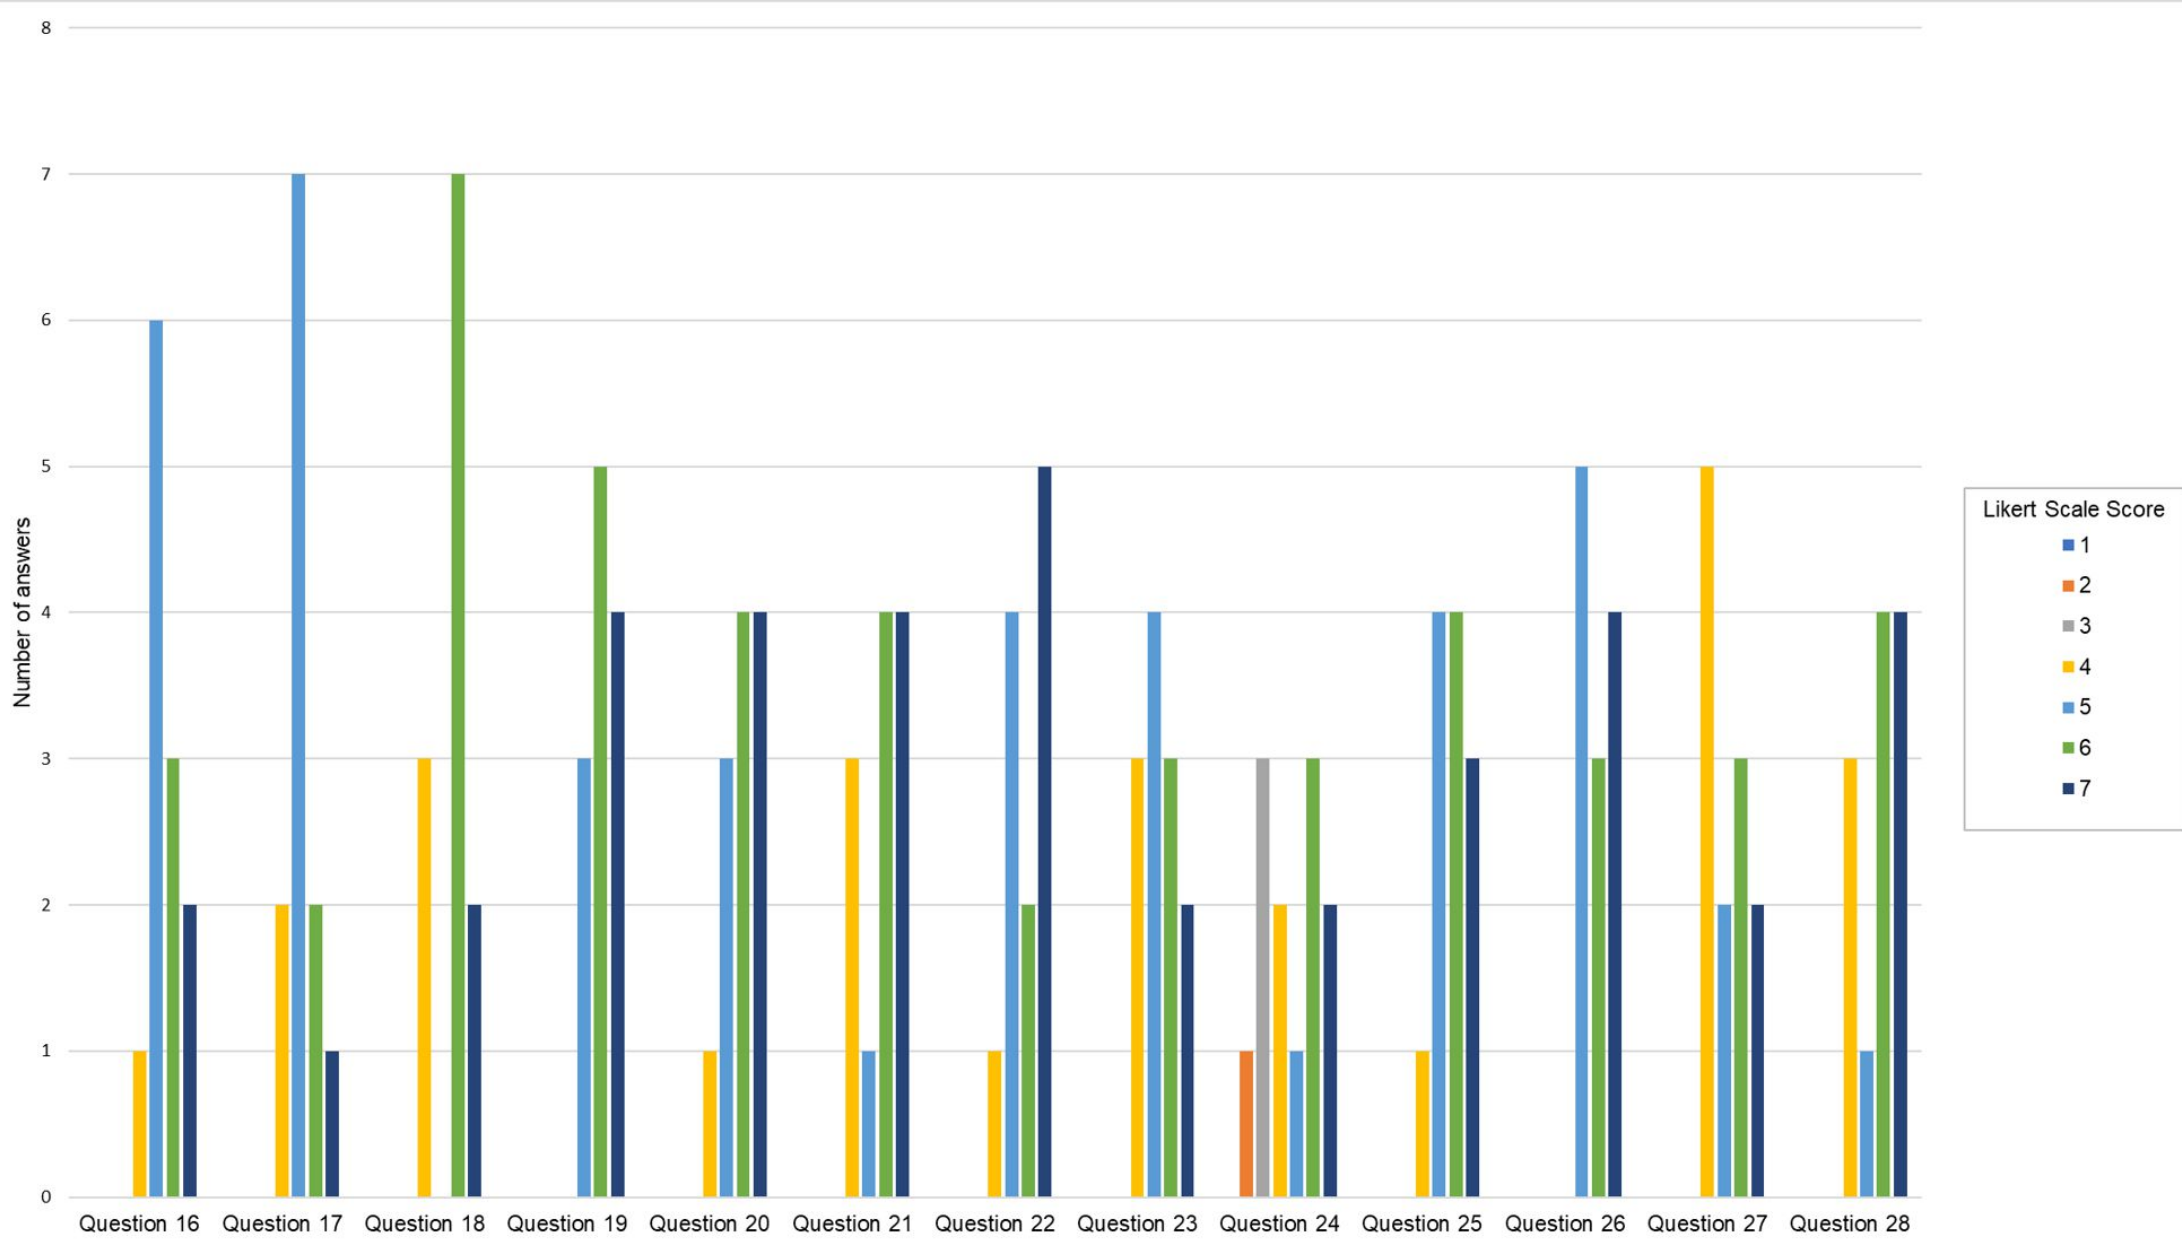

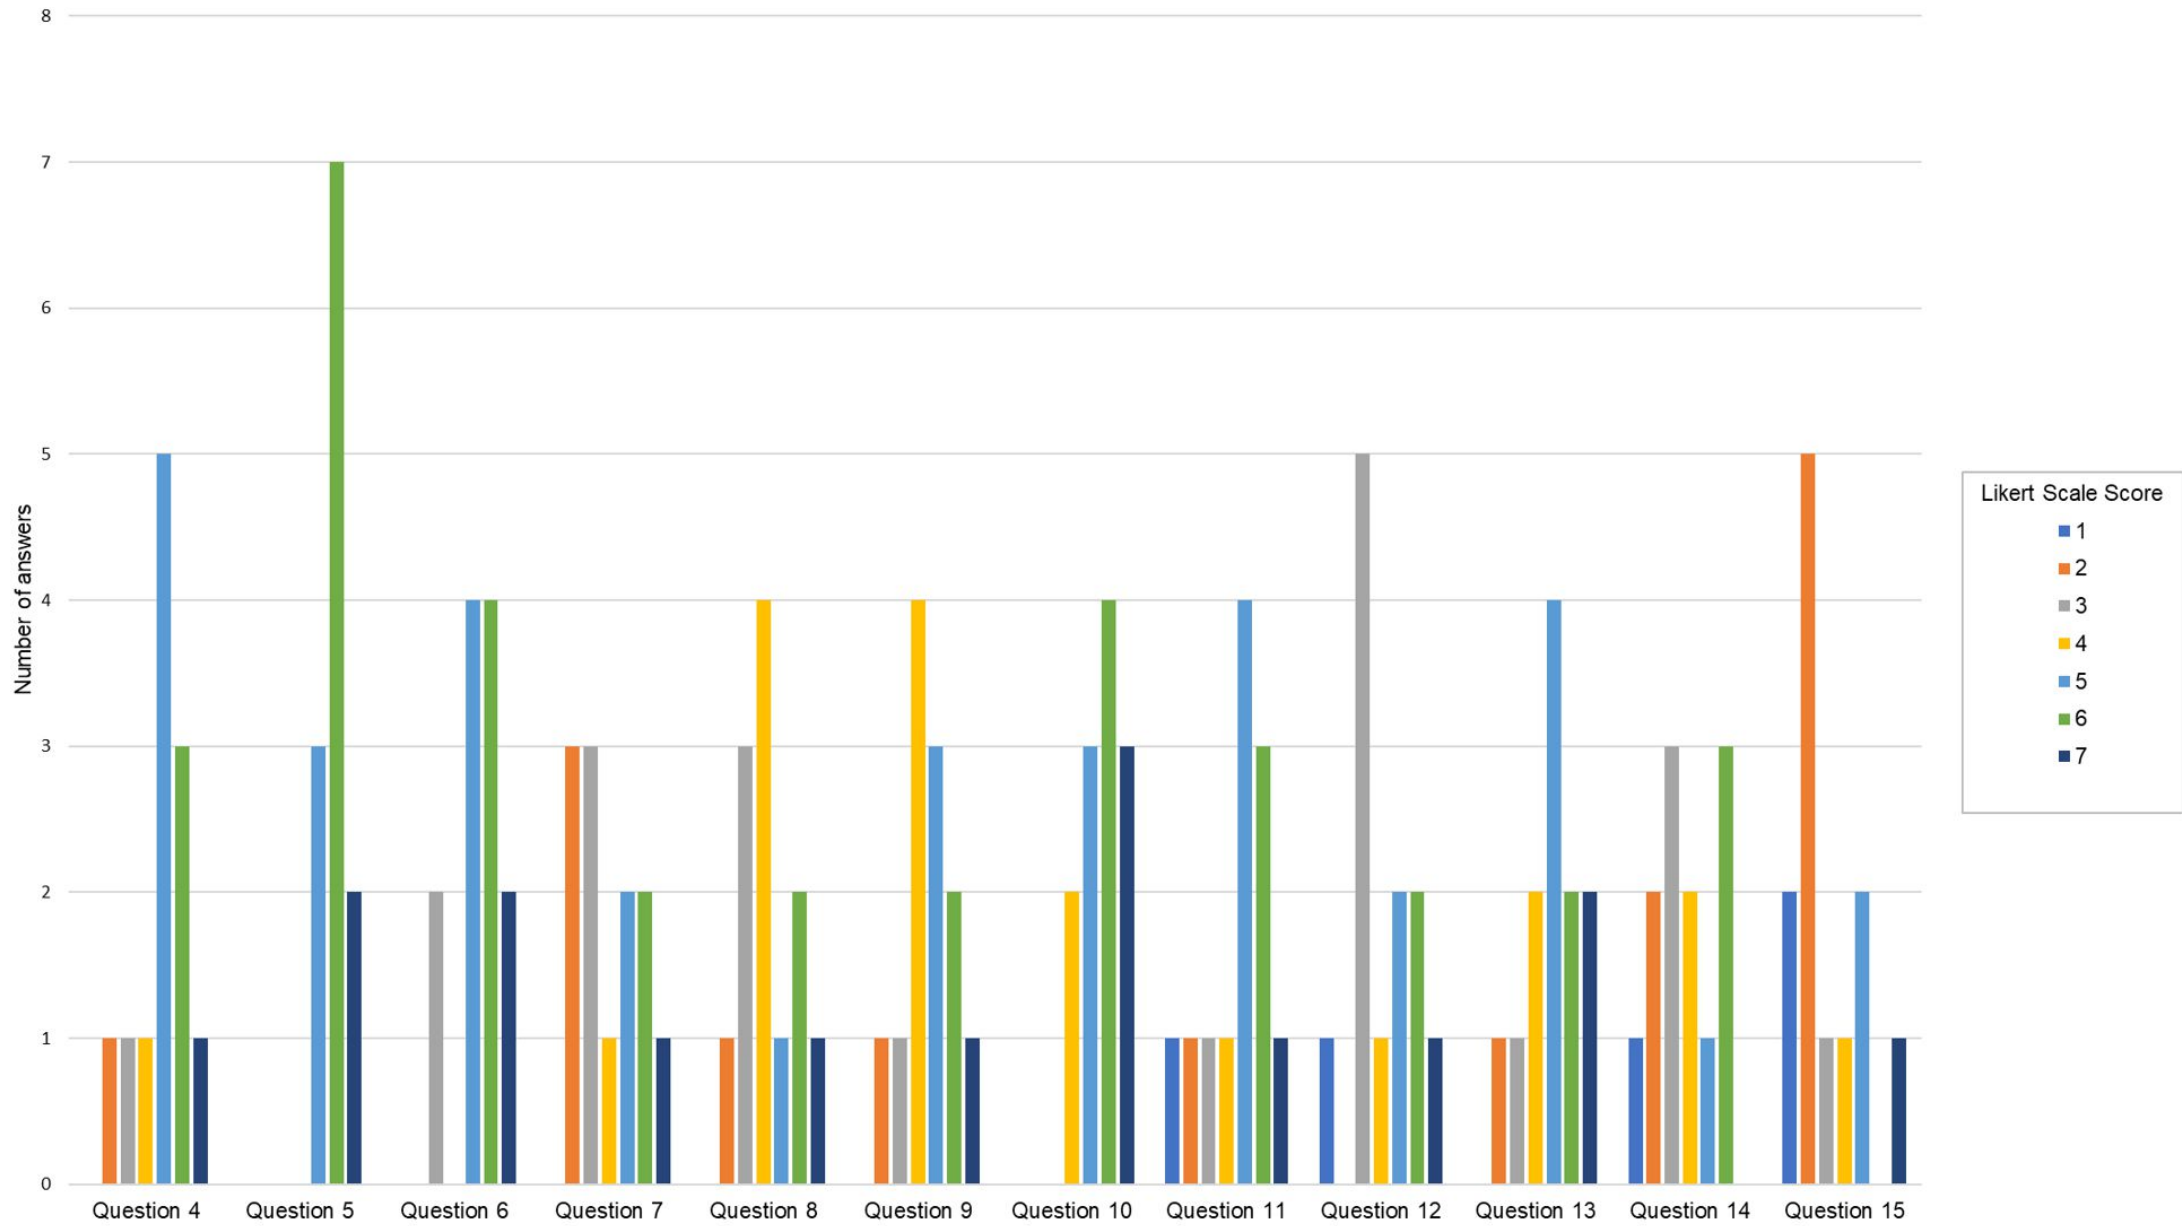

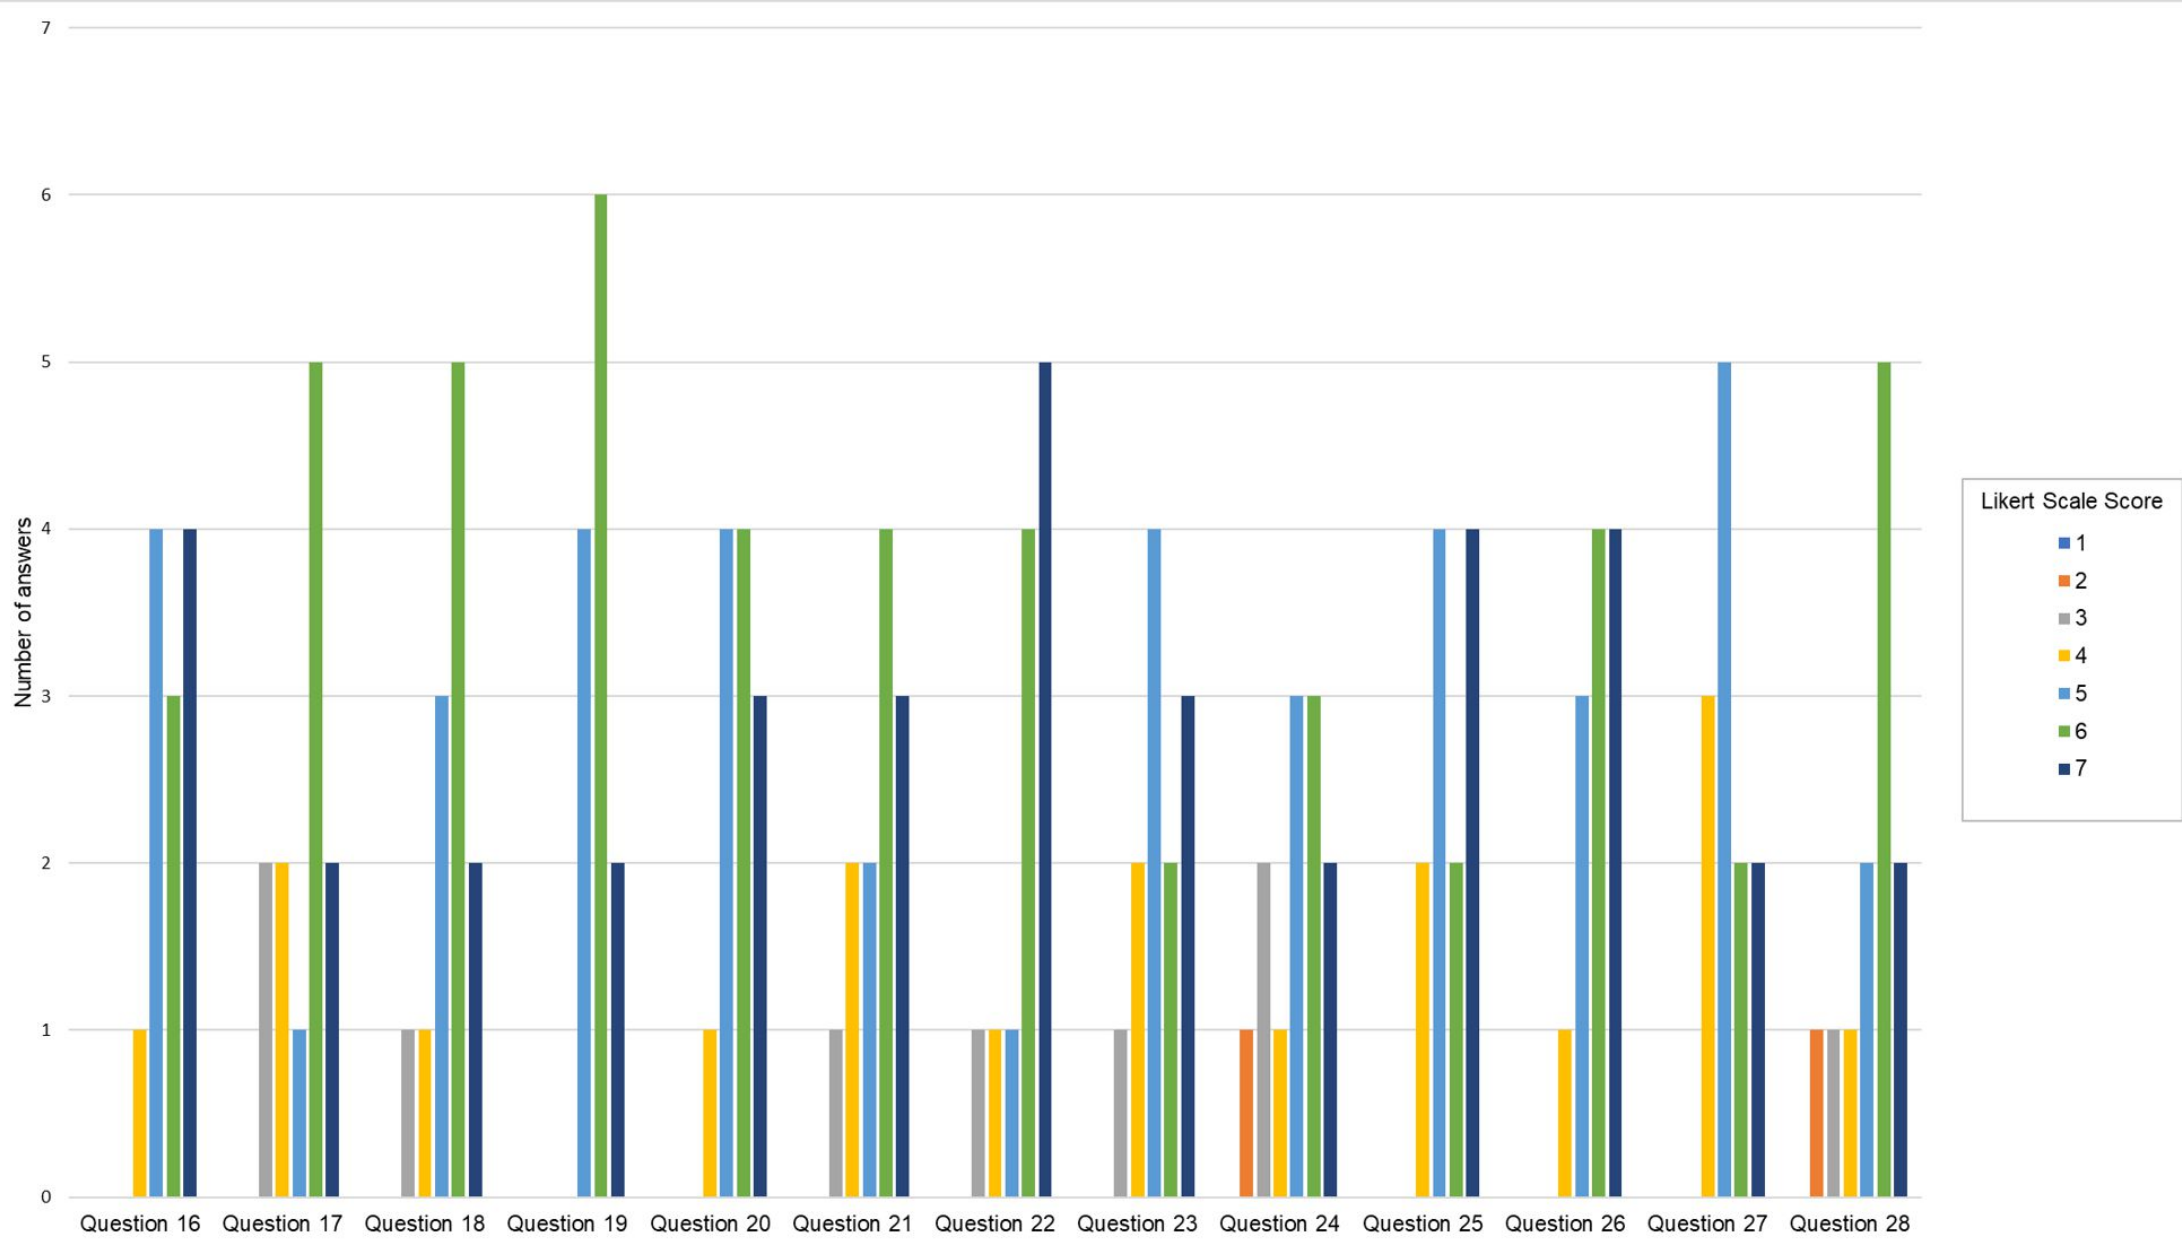

## Figure Captions

**Supplementary Figure 1.** Results of the questionnaire for questions 1 to 15, before the five-day period

**Supplementary Figure 2.** Results of the questionnaire for questions 16 to 28, before the five-day period

**Supplementary Figure 3.** Results of the questionnaire for questions 1 to 15, after the five-day period

**Supplementary Figure 4.** Results of the questionnaire for questions 16 to 28, after the five-day period
